# Supplementary material for: A Highly Efficient Workflow for Detecting and Identifying Sequence Variants in Therapeutic Proteins with a High Resolution LC-MS/MS Method
Source: MDPI journal article supplement (doi:10.3390/molecules28083392), 2023-04-12
Supplement: s1 [file s1]

## SUPPLEMENTARY MATERIAL

# **A Highly Efficient Workflow for Detecting and Identifying Sequence Variants in Therapeutic Proteins with a High Resolution LC-MS/MS Method**

Lance Cadang <sup>1</sup>, Chi Yan Janet Tam <sup>1</sup>, Benjamin Nathan Moore <sup>1</sup>, Juergen Fichtl <sup>2</sup> and Feng Yang <sup>1,\*</sup>

<sup>1</sup> Pharma Technical Development, Genentech, South San Francisco, CA 94080 USA

<sup>2</sup> Pharma Technical Development, Roche Diagnostics GmbH, 82377 Penzberg, Germany

\* Correspondence: yang.feng@gene.com

**Supplementary Table S1.** Maximum, minimum, and midpoint values used for each of the MS parameters in the robustness DOE study

| Parameter               | Units             | Minimum (-) | Maximum (+) | Midpoint (0) |
|-------------------------|-------------------|-------------|-------------|--------------|
| MS1 Resolution          | FWHM @ m/z<br>200 | 60000       | 240000      | 120000       |
| MS/MS<br>Resolution     | FWHM @ m/z<br>200 | 30000       | 120000      | 60000        |
| MS/MS Injection<br>Time | ms                | 50          | 200         | 125          |
| MS Activation           | N/A               | CID         | HCD         | N/A          |

**Supplementary Table S2.** Search Engine Comparison - Mascot vs. PMI Byonic

| SVA<br>Project | Number<br>of SVs | Mascot Score<br>@15 |             | Byonic Score<br>@200 |             | Byonic Score<br>@250 |             | Byonic Score<br>@300 |             |
|----------------|------------------|---------------------|-------------|----------------------|-------------|----------------------|-------------|----------------------|-------------|
|                |                  | #Unique<br>Peptides | #SV<br>PSMs | #Unique<br>Peptides  | #SV<br>PSMs | #Unique<br>Peptides  | #SV<br>PSMs | #Unique<br>Peptides  | #SV<br>PSMs |
| mAb I          | 5                | 623                 | 37          | 643                  | 26          | 525                  | 23          | 428                  | 22          |
| mAb II         | 11               | 317                 | 46          | 405                  | 46          | 326                  | 44          | 267                  | 42          |
| mAb III        | 6                | 145                 | 23          | 322                  | 24          | 232                  | 23          | 177                  | 14          |
| mAb IV         | 1                | 241                 | 1           | 237                  | 1           | 184                  | 1           | 142                  | 0           |

**Supplementary Table S3.** Number of detected sequence variants, unique peptides, and PSMs by Mascot vs. Byonic

| Spike<br>% | Mascot Score<br>@15 |                    |       | Byonic Score<br>@200 |                    |       | Byonic Score<br>@225 |                    |       | Byonic Score<br>@250 |                    |       | Byonic Score<br>@300 |                    |       |
|------------|---------------------|--------------------|-------|----------------------|--------------------|-------|----------------------|--------------------|-------|----------------------|--------------------|-------|----------------------|--------------------|-------|
|            | #SVs                | #Unique<br>Peptide | #PSMs | #SVs                 | #Unique<br>Peptide | #PSMs | #SVs                 | #Unique<br>Peptide | #PSMs | #SVs                 | #Unique<br>Peptide | #PSMs | #SVs                 | #Unique<br>Peptide | #PSMs |
| 0.5        | 6                   | 3775               | 33    | 7                    | 1411               | 32    | 7                    | 1239               | 30    | 7                    | 1068               | 30    | 7                    | 793                | 26    |
| 0.2        | 5                   | 4082               | 14    | 7                    | 1462               | 20    | 7                    | 1261               | 18    | 4                    | 1076               | 13    | 4                    | 807                | 12    |
| 0.1        | 5                   | 3122               | 14    | 5                    | 1380               | 17    | 3                    | 1186               | 14    | 3                    | 1020               | 14    | 2                    | 743                | 7     |

**Supplementary Table S4.** SV hits obtained per SVA of mAbs 3, 4, and 5 using either a 10 ppm MS1 5ppm MS2 or 2 ppm MS1 5 ppm MS2 mass error tolerance in the Byos MS/MS search.

| Sample | Lumos (10, 5) | Lumos (2, 5) | % Further Reduction |
|--------|---------------|--------------|---------------------|
| mAb3   | 83            | 86           | -4%                 |
| mAb4   | 43            | 20           | 53%                 |
| mAb5   | 30            | 22           | 27%                 |

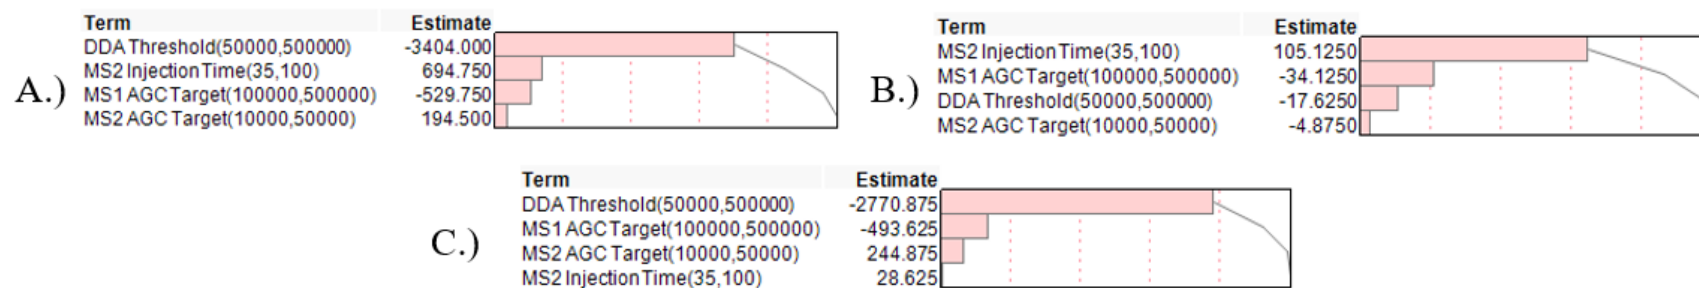

**Supplementary Figure S1.** Pareto plot of estimates showing the relative magnitude of the effects of DDA threshold, MS2 injection time, MS1 AGC target and MS2 AGC target to the abundant peptide aggregate (A) score, low-level peptide aggregate score (B), and total MS/MS queries (C).

A.)

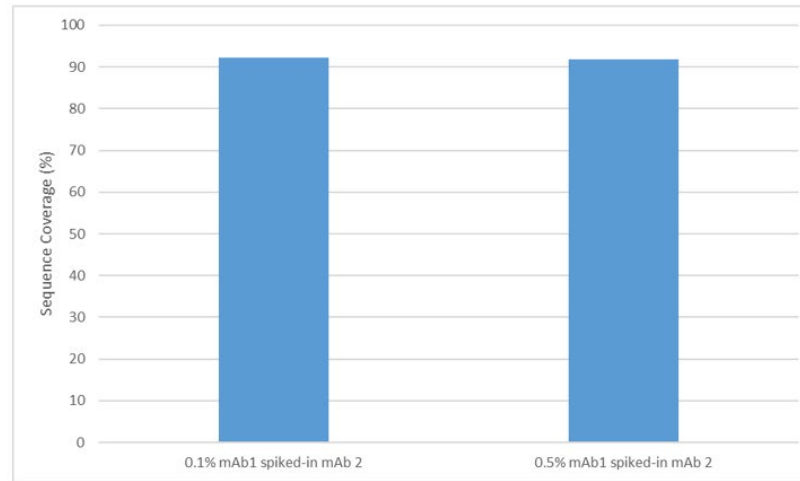

B.)

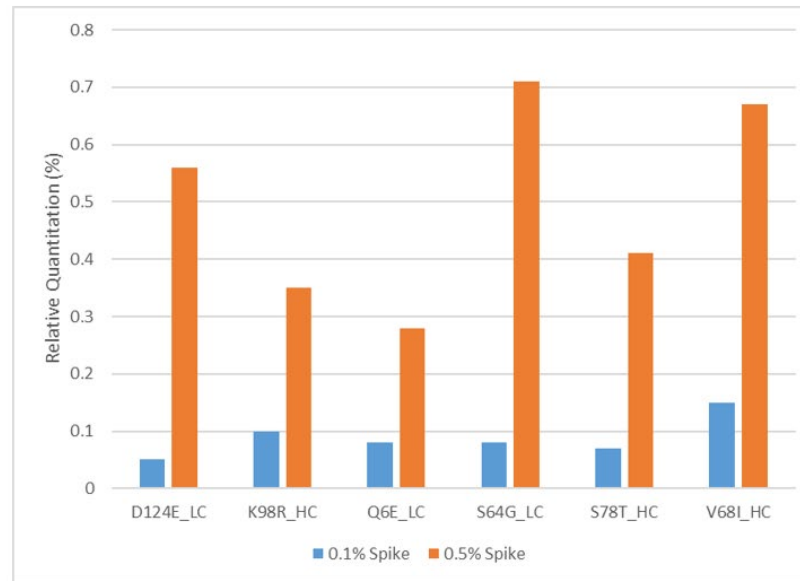

**Supplementary Figure S2.** Comparison of 0.1% vs 0.5% mAb1 spiked-in mAb 2: (A) The sequence coverage of both samples were similar at around ~92%; (B) all six quantitative pairs were detected at levels close to the theoretical relative quantitation of 0.1%.
